# Supplementary material
Source: Springer Nature journal article supplement (https://www.springermedizin.de/resource/supplementary/12885_2007_1054_MOESM3_ESM.pdf/9470990)

**A****SNP309**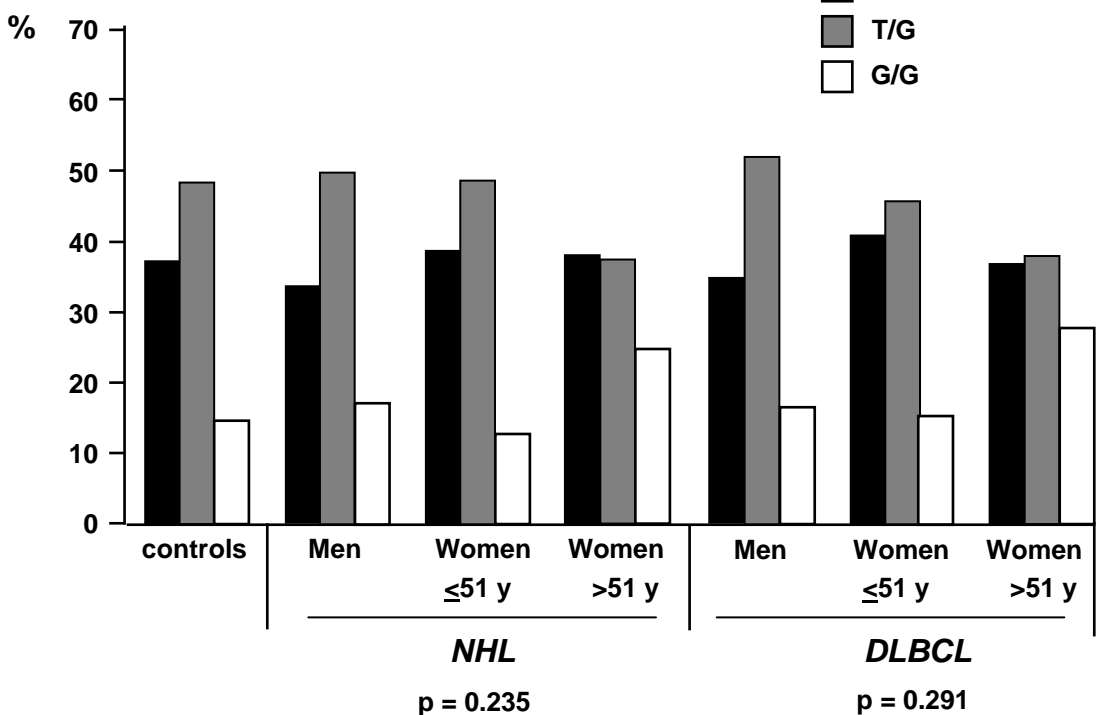**B****SNP72**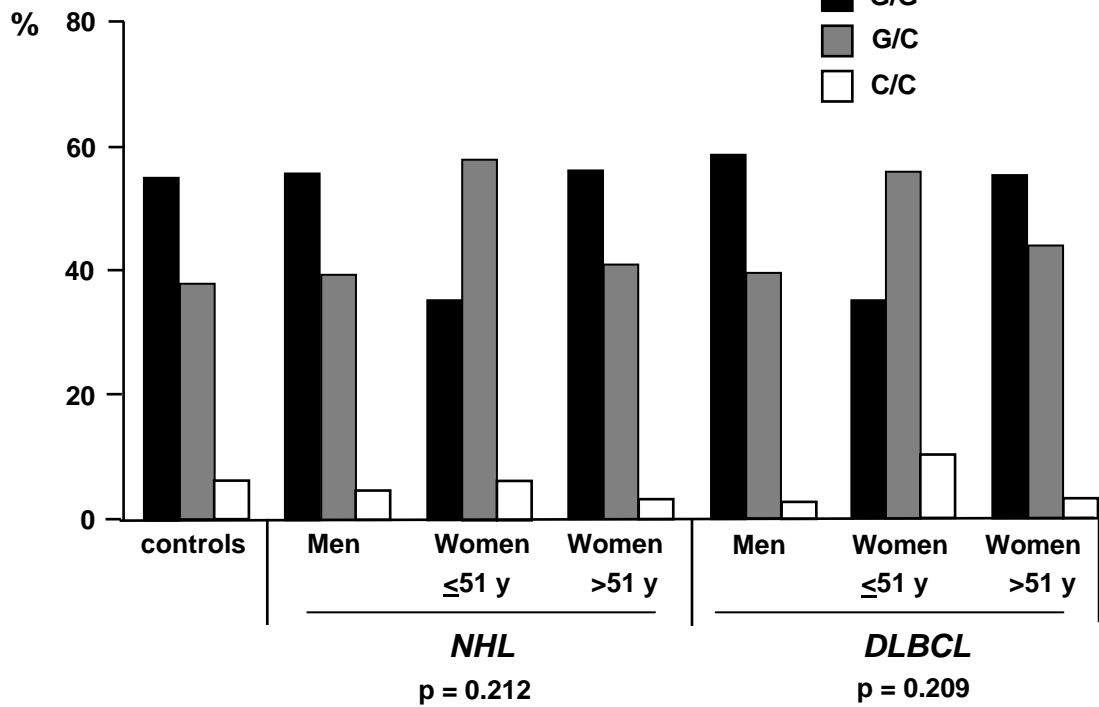

Supplement: MOESM3 [file 9470990]
